1           **SARS-like coronaviruses in horseshoe bats (*Rhinolophus* spp.) in Russia, 2020.**

2           Sergey V. Alkhovsky, Sergey V. Lenshin, Alexey V. Romashin, Tatyana V.

3 Vishnevskaya, Oleg I. Vyshemirsky, Yulia I. Bulycheva, Dmitry K. Lvov, Asya K. Gitelman.

4

5           **Address for correspondence:** Sergey V. Alkhovsky, N.F Gamaleya National Research

6 Center on Epidemiology and Microbiology of Ministry of health of Russian Federation, 18

7 Gamaleya street, 123098 Moscow, Russia; email: [salkh@ya.ru](mailto:salkh@ya.ru), [s\\_alkhovsky@gamaleya.org](mailto:s_alkhovsky@gamaleya.org).

8

9           **Keywords:** SARS-CoV, SARS-CoV-2, bat SARS-like coronaviruses, SARS-CoV-like

10 viruses, viral metagenomics, coronavirus, horseshoe bats, zoonotic viruses, *Rhinolophus*.

11

12           **Affiliations:**

13           D.I. Ivanovsky Institute of Virology of N.F. Gamleya National Center on Epidemiology

14 and Microbiology of Ministry of Health of Russian Federation, Moscow, Russia (S. Alkhovsky,

15 D. Lvov, T. Vishnevskaya, Yu. Bulycheva, A. Gitelman);

16           Reference center on coronavirus infection of N.F. Gamleya National Center on

17 Epidemiology and Microbiology of Ministry of Health of Russian Federation, Moscow, Russia

18 (S. Alkhovsky, T. Vishnevskaya);

19           Federal State Budgetary Scientific Institution «Scientific Research Institute of Medical

20 Primatology» of Russian Academy of Science, Adler, Russia (S. Lenshin, O. Vyshemirsky);

21           Federal State Budgetary Institution «Sochi National Park», Sochi, Russia (A. Romashin)

22

23

24           **Abstract**

25           We found and genetically described two novel SARS-like coronaviruses in feces and oral  
26 swabs of the great (*R. ferrumequinum*) and the lesser (*R. hipposideros*) horseshoe bats in  
27 southern region of Russia. The viruses, named Khosta-1 and Khosta-2, together with related  
28 viruses from Bulgaria and Kenya, form a separate phylogenetic lineage. We found an evidence  
29 of recombination events in evolutionary history of Khosta-1, which involved the acquisition of  
30 structural proteins S, E, and M as well as nonstructural genes ORF3, ORF6, ORF7a, and ORF7b  
31 from a virus that is closely related to Kenyan isolate BtKY72. Examination of bats by RT-PCR  
32 revealed that 62,5% of great horseshoe bats in one of the caves were positive for Khosta-1 virus  
33 while its overall prevalence was 14%. The prevalence of Khosta-2 was 1,75%. Our results show  
34 that SARS-like coronaviruses circulate in horseshoe bats in the region and provide a new data on  
35 their genetic diversity.

36

37           **Introduction**

38           Horseshoe bats (*Rhinolophidae: Rhinolophus*) are considered as a main natural reservoir  
39 and source of zoonotic coronaviruses (CoV) which caused epidemic outbreak of severe acute  
40 respiratory syndrome (SARS) and COVID-19 pandemic in 2002 and 2019, respectively (1,2).  
41 These viruses, designated as SARS-CoV and SARS-CoV-2, together with related viruses found  
42 in bats and other animals (SARS-like coronaviruses or SARS-CoV-like viruses) belong to the  
43 subgenus *Sarbecovirus* of the genus *Betacoronavirus* of the family *Coronaviridae* (3). Horseshoe  
44 bats are wide distributed in Asia, Europe, and North Africa. In East Asia (in particular, in  
45 People's Republic of China (PRC)) SARS-CoV-like viruses circulate in multiple rhinolophid's  
46 species, however the Chinese rufous (*R. sinicus*), the greater (*R. ferrumequinum*), the

47 intermediate (*R. affinis*), and the king (*R. rex*) horseshoe bats seem to be of major importance (4).  
48 In Europe SARS-CoV-like viruses was found in the greater, the lesser (*R. hipposideros*), the  
49 Mediterranean (*R. euryale*), Mehely's (*R. mehelyi*), and Blasius's (*R. blasii*) horseshoe bats (5–8).  
50 The prevalence of SARS-like coronaviruses among bats in different caves-colonies can vary  
51 from 0% to 60% (4,7,9,10). In Russia three species of horseshoe bats (the greater, the lesser, and  
52 Mediterranean) are common in southern regions, lying below about 44° north latitude, mostly  
53 including North Caucasus and Crimea. In present work we hypothesized that SARS-like  
54 coronaviruses circulate in the region in local populations of horseshoe bats. To test this  
55 hypothesis, we examined the colonies of bats located in the southern macroslope of the Greater  
56 Caucasus on northern coast of the Black Sea in Russia. Using metagenomic analysis we found  
57 and genetically described two new SARS-like coronaviruses in feces and oral swabs of the  
58 greater and the lesser horseshoe bats. Further PCR analysis showed a high degree of infection of  
59 bats with discovered viruses in some locations.

60

## 61 **Materials and methods**

62 The samples from bats were collected in Sochi National Park (Sochi-Adler, Krasnodar  
63 krai, Russia) and surrounding areas in March-October 2020. The Sochi National Park is located  
64 on southern macroslope of the Greater Caucasus descending to the northern coast of the Black  
65 Sea (Figure 1). The park stuffs keep records of more than 300 karst formations (caves, breaks,  
66 mines, clefts, etc.) that are natural refuges for bats and other troglophilous animal species. Bats  
67 were caught by hand in eight locations including five caves as well as basements and attics of  
68 houses (Table 1). The bats were caught in the frame of ongoing surveillance of bats populations  
69 constantly carried out in the park. The species of the animals was determined based on their

70 morphological characters by an experienced park zoologist. The length of the forearm and  
71 weight of animals were measured. To collect bat oral swabs (saliva and buccal cells) an  
72 urological swab was placed in the bat's mouth for 10-15 sec and then placed in 250  $\mu$ l of  
73 phosphate-buffered saline (PBS). To collect feces, an animal was placed in a small white cotton  
74 bag for 10-15 min. After that the animal was released, and the feces were collected from the  
75 walls of the bag into cryovials. No bats were harmed during sample collection. A total of 120  
76 samples of oral swabs and 77 samples of feces from five species of bats were collected (Table 1).  
77 The samples were delivered to the laboratory on ice and stored at  $-70^{\circ}\text{C}$  until start of research.

78 Metagenomic analysis was conduct as described anywhere. Briefly, the feces were  
79 suspended and homogenized in 0,5 ml of PBS and pooled by 0,1 ml in three samples (feces from  
80 20-30 animals in the pool). Pooled samples were clarified by centrifugation (10 000 g, 15 min)  
81 and treated with DNase I and RNase I<sub>f</sub> (NEB, Great Britain) for removing of naked out-capsid  
82 nucleic acid. The viral particles were sedimented from treated samples by ultracentrifugation  
83 (30 000 g, 1 h) through 2 ml of 20% sucrose. Virus plaque was resuspended in 0,5 ml PBS. Total  
84 RNA was isolated from 0,25 ml of obtained solution with TRIzol LS reagent (ThermoFisher  
85 Scientific, USA).

86 Total RNA from oral swabs were isolated with TRIzol LS reagent from individual samples  
87 and pooled by 20  $\mu$ l in five pooled samples (20-25 samples in the pool). The pooled RNA was  
88 precipitated by isopropyl alcohol with addition of glycogen followed by additional clarification  
89 with RNeasy MinElute Cleanup kit (Qiagen, Germany). NEBNext rRNA Depletion kit (NEB)  
90 was used to remove bacterial and eukaryotic rRNA from total RNA isolated from pooled  
91 samples. Treated RNA was used for cDNA library preparation by NEBNext Ultra II RNA library  
92 kit for Illumina (NEB).

93 The libraries were sequenced on a HiSeq4000 instrument (Illumina, USA) at the facility of  
94 Resource Center “BioBank” of the Research Park of Saint Petersburg State University (Saint-  
95 Petersburg, Russia). Reads were filtered by quality, trimmed to remove adapter’s sequences, and  
96 assembled *de novo* using CLC Genomics Workbench 7.0 software (Qiagen). Obtained contig  
97 sequences were analyzed using blastx algorithm by DIAMOND software (11) against nr  
98 ‘Viruses’ database that included all reference viral sequences available in GenBank at December  
99 2020. Nucleotide and deduced amino acid sequences were alignment by ClustalW implemented  
100 in MEGAX software (12). The best substitution model was evaluated for each alignment by the  
101 Model selection module in MEGAX software. Phylogenetic trees were inferred by ‘maximum  
102 likelihood’ method using appropriate model with 1000 bootstrap replicates by MEGAX  
103 software. Similarity plot analysis was conducted by SimPlot software (13). Possible  
104 recombination was analyzed by RDP5 software (14).

105 Primers and probes for specific detection of discovered coronaviruses were developed  
106 based on obtained sequences by Beacon 7.0 software (Premier Biosoft, USA). Real-time RT-  
107 PCR was conducted with TaqPath 1-Step Multiplex Master Mix (ThermoFisher Scientific, USA)  
108 and total RNA isolated by TRIzol LS reagent from individual oral swabs and feces samples.

109

## 110 **Results**

111 **Results of sequencing of the samples.** In total, 124 522 978 reads for three pooled fecal  
112 samples and 170 112 341 reads for five pooled oral swab samples were obtained. The reads were  
113 *de novo* assembled in contigs and analyzed by blastx algorithm for presence of viral sequences.  
114 The search results revealed two extended contigs with a length of approximately 29 Kb with  
115 open reading frames (ORFs) with similarity to members of the genus *Betacoronavirus* in the

116 pools one and three of fecal samples, respectively. With further analysis, a near-complete  
117 genome of two novel SARS-like coronaviruses was sequenced. Matching contigs have also been  
118 found in corresponding oral swab samples, but with smaller length and coverage. Two found  
119 SARS-like coronaviruses were named BtCoV/Khosta-1/Rh/Russia/2020 and BtCoV/Khosta-  
120 2/Rh/Russia/2020 and placed in GenBank by accession numbers MZ190137 and MZ190138,  
121 respectively. Below they are referred to as Khosta-1 and Khosta-2, respectively.

122 **Genetic and phylogenetic analysis.** The genomic organization of Khosta-1 and Khosta-2  
123 is similar to that of other SARS-like coronaviruses (Figure 2). Approximately two thirds of the  
124 genome of coronaviruses is occupied by ORF1a and ORF1b genes which encode the proteins of  
125 the replicative complex and translated as ORF1ab polyprotein due to ribosomal shifting. The rest  
126 of the genome contains genes of structural proteins (S, E, M, and N), which form a virion, as  
127 well as several non-structural proteins (ORF3, ORF6, ORF7, ORF8, ORF9, and ORFX), the  
128 presence and structure of which varies in different viruses (3). Genome organization of Khosta-1  
129 and Khosta-2 has the greatest similarity with BtCoV/BM48-31/2008 and BtKY72 viruses – two  
130 SARS-like coronaviruses found in horseshoe bats in Bulgaria and Kenya in 2008 and 2007,  
131 respectively (8,15). Their peculiarity is the absent of ORF8 gene which is common in bat SARS-  
132 like coronaviruses from East and Southeast Asia (Figure 2).

133 Pairwise alignments of the deduced proteins of Khosta-1 and Khosta-2 virus with those of  
134 other SARS-like coronaviruses showed its highest similarity with BtCoV/BM48-31/2008 and  
135 BtKY72 viruses (Table 2). Khosta-1 is closest related to BtCoV/BM48-31/2008 with 92,5% aa  
136 and 99% aa identity in the conservative ORF1a and ORF1b proteins, respectively. Similarity of  
137 Khosta-1 with SARS-CoV and related viruses from China are on average 81,5% aa identity in  
138 ORF1a protein and 96% in ORF1b protein. Comparison Khosta-1 with SARS-CoV-2 viruses

139 revealed 77,5% and 94,2% aa identity for ORF1a and ORF1b proteins, respectively. Despite the  
140 high similarity of Khosta-1 and BtCoV/BM48-31/2008 in ORF1a and ORF1b proteins, structural  
141 proteins S, E, and M of Khosta-1 are more similar to those of Kenyan virus BtKY72. Khosta-1  
142 and BtKY72 share 89,1%, 98,7%, and 97,29% aa identity for S, E, and M proteins, whereas  
143 these values for Khosta-1 and BtCoV/BM48-31/2008 are 84,37%, 89,47, and 95%, respectively.  
144 N protein of Khosta-1 is more similar to that of BtCoV/BM48-31/2008 (96,64% aa identity) than  
145 BtKY72 (92,6% aa identity).

146 In contrast, Khosta-2 does not have such an increased similarity with some group of  
147 sarbecoviruses and has 79-81% aa identity with SARS-CoV viruses and 76-77% with SARS-  
148 CoV-2 viruses in ORF1a protein. ORF1b protein of Khosta-2 has 93,5-95% aa identities with all  
149 other bat SARS-like coronaviruses. Comparison of proteins of Khosta-1 and Khosta-2 showed  
150 that these viruses differ from each other at about the same level as Khosta-2 differs from other  
151 bat SARS-like coronaviruses (Table 2).

152 **Recombination analysis.** Genome sequence similarity between Khosta-1, Khosta-2,  
153 BtCoV/BM48-31/2008, and BtKY72 was analyzed by Simplot and RDP5 software (Figure 2A-  
154 2C). Simplot analysis showed high degree of similarity of Khosta-1 and BtCoV/BM48-31/2008  
155 in the ORF1ab and N genes and a decrease in the similarity in the S-ORF7b region. Results of  
156 analysis carried out by RDP5 software using different methods implemented in the program  
157 showed clear signals of recombination events in evolutionary history of Khosta-1 (Figure 2C).  
158 Recombination events presumably included acquisition of S-ORF7b region by ancestor of  
159 Khosta-1 virus from a virus closely related to BtKY72.

160 **Phylogenetic analysis.** Phylogenetic analysis based on ORF1ab protein sequences showed  
161 that Khosta-1, Khosta-2, BtCoV/BM48-31/2008, and BtKY72 form a monophyletic lineage

162 located between SARS-CoV and SARS-CoV-2 lineages of the *Sarbecovirus* subgenus (Figure  
163 3A). The separate cluster this group of viruses also formed on phylogenetic tree based on  
164 nucleotide sequences of S gene (Figure 3B). Topology of tree confirms the probable  
165 recombination event in evolutionary history of Khosta-1. In ORF1ab tree Khosta-1 is grouped  
166 together with BtCoV/BM48-31/2008, while in S gene tree with BtKY72.

167 **Analysis of receptor binding motif (RBM) of S protein.** Alignment of amino acid  
168 sequences of RBM of Khosta-1 and Khosta-2 with certain sarbecoviruses are presented in  
169 Figure 4. This is a highly variable region where multiple substitutions and deletions occur among  
170 SARS-CoV related viruses. Khosta-1 and Khosta-2 as well as BtCoV/BM48-31/2008 have a  
171 common deletion of four aa in the N-part of RBM. This deletion partially overlapping with the  
172 deletion that is characteristic of HKU3-1 and related strains of bat SARS-CoV-like viruses that  
173 unable to bind angiotensin-converting enzyme 2 (ACE2) receptor. We analyzed aa positions in  
174 RBM which are thought to be crucial for binding of ACE2 receptor and, therefore, important for  
175 adaptation of bat SARS-like coronaviruses to human (16,17). Only at position 442 Khosta-1 and  
176 Khosta-2 share a common amino acid (L), which is also inherent in SARS-CoV-2 and related  
177 viruses. Despite the significant genetic distance between Khosta-1 and BtKY72, crucial positions  
178 in RBM and their context coincide between them. In contrast, position 479, 480, and 487 of  
179 Khosta-2 coincides poorly with other groups of viruses (Figure 4).

180 **PCR testing.** We developed primers and probes for specific detection of Khosta-1 and  
181 Kosta-2 viruses in feces and oral swabs by real time RT-PCR (Appendix Table). Results of PCR  
182 testing of samples are presented in Table 1. RNA of Khosta-1 was detected mostly in the greater  
183 horseshoe bats collected in Kolokolnaya cave. All four found positive oral swabs belonged to  
184 animals with positive fecal samples. In other locations Khosta-1 virus was detected only in two



185 fecal samples – from the greater horseshoe bat from Khosta 1 cave and the lesser horseshoe bat  
186 from Partizanskaya cave, respectively. Also note that RNA of Khosta-1 was detected in feces  
187 much more often than in oral swabs and in a higher titer (based on Ct value, data not shown).  
188 RNA of Khosta-2 virus was detected in two lesser horseshoe bats collected in basement of the  
189 building at Research Institute of Medical Primatology. In one animal RNA of Khosta-2 was  
190 detected in both feces and oral swabs, and in another only swab.

191

## 192 **Discussion**

193 The emergence of SARS-CoV and SARS-CoV-2 viruses is a result of adaptation of SARS-  
194 CoV-like viruses, circulated in the horseshoe bats, to human (18,19). Horseshoe bats are  
195 widespread and, presumably, SARS-like coronaviruses circulate in all parts of their range  
196 including Asia, Europe and northern Africa. However, little information exists on the genetic  
197 diversity of bat SARS-like coronaviruses in the regions outside East and Southeast Asia. We  
198 described here two novel SARS-like coronaviruses circulated in the horseshoe bats in southern  
199 region of Russia. Khosta-1 and Khosta-2 viruses are closely related to viruses recently described  
200 in Bulgaria (strain BtCoV/BM48-31/2008) and Kenya (strain BtKY72) (8,15). Together they  
201 form a separate “western” (as they are found in the western part of the range of horseshoe bats)  
202 phylogenetic lineage of bat SARS-like coronaviruses. A feature of these viruses is the absence of  
203 ORF8 gene, which is common in SARS-CoV, SARS-CoV-2, and most of bat SARS-like  
204 coronaviruses of eastern lineages.

205 SARS-CoV and SARS-CoV-2 recognize host angiotensin-converting enzyme 2 (ACE2) as  
206 its receptor. Crucial for binding of ACE2 receptor amino acids (442, 487, 479, 487, and 491) are  
207 located in the RBM of the S protein (17,20). These amino acids and its context in RBM of

208 Khosta-1 and Khosta-2, like most other bat SARS-like coronaviruses, are quite different from  
209 SARS-CoV and SARS-CoV-2 viruses. The most bat SARS-like coronaviruses unable to bind  
210 ACE2 receptor of human and do not infect its cells (21). However, several strains of bat SARS-  
211 like coronaviruses that can use ACE2 receptor and whose proteins are highly similar to SARS-  
212 CoV or SARS-CoV-2 have been recently found in the Chinese rufous (*R. sinicus*) and the  
213 intermediate (*R. affinis*) horseshoe bats in People's Republic of China (22–25). In this vein, it is  
214 argued that direct progenitors of SARS-CoV and SARS-CoV-2 originated after sequential  
215 recombination events between bat SARS-like coronaviruses. Since the recombination is of great  
216 importance in the evolution of coronaviruses, we analyzed possible recombination events in the  
217 western lineage of bat SARS-like coronaviruses. Despite the small number of known full-length  
218 sequences (only four), we observe an evidence of recombination in evolutionary history of  
219 Khosta-1. The alleged recombination event involved the acquisition of structural proteins S, E,  
220 and M as well as nonstructural genes ORF3, ORF6, ORF7a, and ORF7b from a virus that is  
221 closer to the Kenyan isolate BtKY72 than to the European strain BtCoV/BM48-31/2008. Based  
222 on this, we can assume that genetic diversity of viruses in the region is significantly higher than  
223 is known today and there is constant exchange of genes between them. These findings require  
224 further investigation of the diversity of circulating variants, with particular emphasis on the  
225 diversity of the S gene.

226       Using RT-PCR we showed that 14% of tested horseshoe bats were carriers for Khosta-1  
227 virus and 1,75% for Khosta-2 virus. However, most of the Khosta-1 positive samples were found  
228 in only one cave (Kolokolnaya cave) where infection rate of greater horseshoe bats reached  
229 62,5%. This bias, together with the small number of samples from other locations, makes it  
230 difficult to accurately estimate the prevalence of Khosta-1 in the region and requires further

231 research. The closest European region where such studies have been carried out is Bulgaria:  
232 according to the data obtained by J. Drexler with coauthor (2010) SARS-like coronaviruses were  
233 detected in 13,3% of greater horseshoe bat, 15,9% of Blasius's horseshoe bat, 30,8% of  
234 Mehely's horseshoe bat, and 32,1% of Mediterranean horseshoe bat (8). Another studies found  
235 38.8% positive lesser horseshoe bats in Slovenia and 37,9% positive greater horseshoe bats in  
236 France (5,6). All this data show that the prevalence of SARS-like coronaviruses in horseshoe  
237 bats in their western part of range can vary widely between different species, locations, and  
238 possibly the time of year of observation.

239 In conclusion, we have shown that SARS-like coronaviruses circulate in horseshoe bats in  
240 southern region of Russia and provide a new information on its genomics. Genetic diversity,  
241 prevalence, host range, as well as potential threat to human of these viruses remain to be  
242 determined.

243

#### 244 **Acknowledgments**

245 The work was funded by Russian Foundation for Basic Research (RFBR), project  
246 No. 20-04-60154.

247

248 **Author Bio** (first author only, unless there are only 2 authors)

249 Sergey V. Alkhovsky is a head of laboratory of biotechnology at D.I. Ivanovsky Institute  
250 of Virology of N.F. Gamleya National Center on Epidemiology and Microbiology in Moscow,  
251 Russia. His scientific interests are ecology, genomics, and evolution of zoonotic viruses with  
252 special emphasizing to emerging and reemerging viruses that pose serious threat to public health.

253 It includes arboviruses as well as zoonotic viruses of rodents, bats, and birds, distributed in  
254 Northern Eurasia.

255

## 256 **References**

- 257 1. Lau SK, Woo PC, Li KS, Huang Y, Tsoi HW, Wong BH, et al. Severe acute respiratory  
258 syndrome coronavirus-like virus in Chinese horseshoe bats. *Proc Natl Acad Sci U S A*.  
259 2005;102(39):14040–5.
- 260 2. Li W, Shi Z, Yu M, Ren W, Smith C, Epstein JH, et al. Bats are natural reservoirs of  
261 SARS-like coronaviruses. *Science*. 2005; 310(5748):676–9.
- 262 3. de Groot RJ, Baker SC, Baric R, Enjuanes L, Gorbalenya AE, Holmes K V, et al. Family  
263 Coronaviridae. In: King AM, Adams MJ, Carstens EB, Lefkowitz EJ, editors. *Virus*  
264 *taxonomy : classification and nomenclature of viruses : ninth report of the International*  
265 *Committee on Taxonomy of Viruses*. 1sted ed. London: Elsevier; 2012. p. 806–28.
- 266 4. Fan Y, Zhao K, Shi Z-L, Zhou P. Bat Coronaviruses in China. *Viruses*. 2019;11(3):210.
- 267 5. Rihtarič D, Hostnik P, Steyer A, Grom J, Toplak I. Identification of SARS-like  
268 coronaviruses in horseshoe bats (*Rhinolophus hipposideros*) in Slovenia. *Arch Virol*.  
269 2010;155(4):507–14.
- 270 6. Ar Gouilh M, Puechmaille SJ, Diancourt L, Vandenbogaert M, Serra-Cobo J, Lopez Roig  
271 M, et al. SARS-CoV related Betacoronavirus and diverse Alphacoronavirus members  
272 found in western old-world. *Virology*. 2018;517:88–97.
- 273 7. Balboni A, Palladini A, Bogliani G, Battilani M. Detection of a virus related to  
274 betacoronaviruses in Italian greater horseshoe bats. *Epidemiol Infect*. 2011;139(2):216–9.
- 275 8. Drexler JF, Gloza-Rausch F, Glende J, Corman VM, Muth D, Goettsche M, et al.

- 276 Genomic Characterization of Severe Acute Respiratory Syndrome-Related Coronavirus in  
277 European Bats and Classification of Coronaviruses Based on Partial RNA-Dependent  
278 RNA Polymerase Gene Sequences. *J Virol.* 2010;84(21):11336–49.
- 279 9. Wang LF, Shi Z, Zhang S, Field H, Daszak P, Eaton BT. Review of bats and SARS.  
280 *Emerg Infect Dis.* 2006;12(12):1834–40.
- 281 10. Drexler JF, Corman VM, Drosten C. Ecology, evolution and classification of bat  
282 coronaviruses in the aftermath of SARS. *Antiviral Res.* 2014;101:45–56.
- 283 11. Buchfink B, Xie C, Huson DH. Fast and sensitive protein alignment using DIAMOND.  
284 *Nature Methods.* 2015.12(1):59–60.
- 285 12. Tamura K, Peterson D, Peterson N, Stecher G, Nei M, Kumar S. MEGA5: molecular  
286 evolutionary genetics analysis using maximum likelihood, evolutionary distance, and  
287 maximum parsimony methods. *Mol Biol Evol.* 2011;28(10):2731–9.
- 288 13. Lole KS, Bollinger RC, Paranjape RS, Gadkari D, Kulkarni SS, Novak NG, et al. Full-  
289 length human immunodeficiency virus type 1 genomes from subtype C-infected  
290 seroconverters in India, with evidence of intersubtype recombination. *J Virol.*  
291 1999;73(1):152–60.
- 292 14. Martin DP, Murrell B, Golden M, Khoosal A, Muhire B. RDP4: Detection and analysis of  
293 recombination patterns in virus genomes. *Virus Evol.* 2015;1(1):vev003.
- 294 15. Tong S, Conrardy C, Ruone S, Kuzmin I V, Guo X, Tao Y, et al. Detection of novel  
295 SARS-like and other coronaviruses in bats from Kenya. *Emerg Infect Dis.*  
296 2009;15(3):482–5.
- 297 16. Li F. Receptor recognition and cross-species infections of SARS coronavirus.  
298 2013;100(1):246-54.

- 299 17. Wan Y, Shang J, Graham R, Baric RS, Li F. Receptor Recognition by the Novel  
300 Coronavirus from Wuhan: an Analysis Based on Decade-Long Structural Studies of  
301 SARS Coronavirus. *J Virol.* 2020;94(7):e00127.
- 302 18. Li W, Shi Z, Yu M, Ren W, Smith C, Epstein JH, et al. Bats are natural reservoirs of  
303 SARS-like coronaviruses. *Science.* 2005;310(5748):676–9.
- 304 19. Zhou P, Yang X Lou, Wang XG, Hu B, Zhang L, Zhang W, et al. A pneumonia outbreak  
305 associated with a new coronavirus of probable bat origin. *Nature.* 2020; 579(7798):270-  
306 273.
- 307 20. Li W, Moore MJ, Vasllieva N, Sui J, Wong SK, Berne MA, et al. Angiotensin-converting  
308 enzyme 2 is a functional receptor for the SARS coronavirus. *Nature.* 2003 Nov  
309 27;426(6965):450–4.
- 310 21. Ren W, Qu X, Li W, Han Z, Yu M, Zhou P, et al. Difference in Receptor Usage between  
311 Severe Acute Respiratory Syndrome (SARS) Coronavirus and SARS-Like Coronavirus of  
312 Bat Origin. *J Virol.* 2008 Feb 15;82(4):1899–907.
- 313 22. Ge XY, Li JL, Yang X Lou, Chmura AA, Zhu G, Epstein JH, et al. Isolation and  
314 characterization of a bat SARS-like coronavirus that uses the ACE2 receptor. *Nature.*  
315 2013;503(7477):535–8.
- 316 23. Hu B, Zeng LP, Yang X Lou, Ge XY, Zhang W, Li B, et al. Discovery of a rich gene pool  
317 of bat SARS-related coronaviruses provides new insights into the origin of SARS  
318 coronavirus. *PLoS Pathog.* 2017; 13(11):e1006698.
- 319 24. Lau SKP, Feng Y, Chen H, Luk HKH, Yang W-H, Li KSM, et al. Severe Acute  
320 Respiratory Syndrome (SARS) Coronavirus ORF8 Protein Is Acquired from SARS-  
321 Related Coronavirus from Greater Horseshoe Bats through Recombination. *J Virol.* 2015

322 Oct 15;89(20):10532–47.

323 25. Ge XY, Wang N, Zhang W, Hu B, Li B, Zhang YZ, et al. Coexistence of multiple  
 324 coronaviruses in several bat colonies in an abandoned mineshaft. *Viol Sin.* 2016 Feb  
 325 1;31(1):31–40.

326

327

328 Table 1. The bat samples collected and results of RT-PCR testing for Kosta-1 and

329 Khosta-2 viruses.

| Location                                                                                          | Bat species                                          | Number of samples collected |       | Khosta-1 virus positive samples (%*) |            | Khosta-2 virus positive samples (%*) |          |
|---------------------------------------------------------------------------------------------------|------------------------------------------------------|-----------------------------|-------|--------------------------------------|------------|--------------------------------------|----------|
|                                                                                                   |                                                      | Oral swabs                  | Feces | Oral swabs                           | Feces      | Oral swabs                           | Feces    |
| Basement of the building at Research Institute of Medical Primatology (43°26'06.3"N 39°59'26.4"E) | Lesser horseshoe bat ( <i>R. hipposideros</i> )      | 27                          | 24    | 0                                    | 0          | 1 (3,7%)                             | 2 (8,3%) |
|                                                                                                   | Mediterranean horseshoe bat ( <i>R. euryale</i> )    | 1                           | 1     | 0                                    | 0          | 0                                    | 0        |
| Museinaya cave (43°33'34.3"N 39°53'46.2"E)                                                        | Greater horseshoe bat ( <i>R. ferrumequinum</i> )    | 4                           | 2     | 0                                    | 0          | 0                                    | 0        |
|                                                                                                   | Lesser horseshoe bat ( <i>R. hipposideros</i> )      | 3                           | 2     | 0                                    | 0          | 0                                    | 0        |
| Khosta 1 cave (43°33'49.5"N 39°53'57.2"E)                                                         | Greater horseshoe bat ( <i>R. ferrumequinum</i> )    | 21                          | 13    | 0                                    | 1 (7,7%)   | 0                                    | 0        |
|                                                                                                   | Common bent-wing bat <i>Miniopterus schreibersii</i> | 3                           | 1     | 0                                    | 0          | 0                                    | 0        |
| Kolokolnaya cave (43°33'08.3"N, 39°56'02.4"E)                                                     | Greater horseshoe bat ( <i>R. ferrumequinum</i> )    | 36                          | 24    | 4 (11%)                              | 15 (62,5%) | 0                                    | 0        |





|       |          | like<br>BGR/20<br>08<br>(Bulgari<br>a, 2008) | like<br>BtKY7<br>2<br>(Kenya<br>, 2007) | 2005-<br>2016)* | like<br>SZ3<br>(China,<br>2003) | Urbani<br>(2003) | like<br>RatG13<br>(China,<br>2013) | CoV-2-<br>like<br>(China,<br>2017) | Wuhan<br>-Hu-1<br>(2019) |       |
|-------|----------|----------------------------------------------|-----------------------------------------|-----------------|---------------------------------|------------------|------------------------------------|------------------------------------|--------------------------|-------|
| ORF1a | Khosta-1 | 92,95                                        | 84,6                                    | 81,53-81,6      | 81,67                           | 81,53            | 77,2                               | 77,89                              | 77,32                    | 82    |
|       | Khosta-2 | 81,1                                         | 80,9                                    | 79,4-79,6       | 79,5                            | 79,4             | 76,3                               | 77,1                               | 76,45                    |       |
| ORF1b | Khosta-1 | 99,07                                        | 96,3                                    | 95,82-96,3      | 96,15                           | 96,15            | 94,22                              | 94,22                              | 94,21                    | 94,75 |
|       | Khosta-2 | 94,7                                         | 93,7                                    | 94,9-95,17      | 95,02                           | 94,9             | 93,44                              | 93,47                              | 93,5                     |       |
| S     | Khosta-1 | 84,37                                        | 89,11                                   | 75,5-76,2       | 75,7                            | 75,7             | 73,0                               | 72,4                               | 72,22                    | 82    |
|       | Khosta-2 | 79,54                                        | 79,7                                    | 73,03-73,9      | 73,2                            | 73,0             | 72,5                               | 71,74                              | 72,54                    |       |
| ORF3  | Khosta-1 | 85,98                                        | 86,7                                    | 66,8-72,3       | 70,8                            | 70,8             | 65,1                               | 66,2                               | 64,7                     | 81,8  |
|       | Khosta-2 | 77,9                                         | 82,22                                   | 67,9-69,34      | 67,15                           | 67,5             | 64,5                               | 65,8                               | 63,27                    |       |
| E     | Khosta-1 | 89,47                                        | 98,7                                    | 87,0            | 87                              | 87               | 93,42                              | 93,42                              | 93,42                    | 94,7  |
|       | Khosta-2 | 88,16                                        | 94,74                                   | 90,7            | 90,7                            | 90,7             | 89,5                               | 89,5                               | 89,5                     |       |
| M     | Khosta-1 | 95,0                                         | 97,29                                   | 91,86-<br>92,31 | 92,31                           | 91,86            | 88,24                              | 87,73                              | 88,13                    | 91    |
|       | Khosta-2 | 90,9                                         | 90,5                                    | 88,7-89,6       | 90,5                            | 89,6             | 87,3                               | 87,27                              | 87,0                     |       |
| ORF6  | Khosta-1 | 68,25                                        | 63,0                                    | 49,21-<br>52,38 | 49,21                           | 49,21            | 50,82                              | 50,82                              | 50,82                    | 58,73 |
|       | Khosta-2 | 58,1                                         | 58,1                                    | 44,4-47,6       | 46,03                           | 46,03            | 46,7                               | 46,7                               | 46,7                     |       |
| ORF7a | Khosta-1 | 69,7                                         | 70,6                                    | 58-59,7         | 61,34                           | 61,34            | 58,5                               | 59,32                              | 58,5                     | 73,5  |
|       | Khosta-2 | 63,25                                        | 70,34                                   | 58,2-59,26      | 60,0                            | 60,0             | 60,0                               | 58,3                               | 59,13                    |       |
| ORF7b | Khosta-1 | 86,05                                        | 81,4                                    | 71,8            | 71,8                            | 71,8             | 61,5                               | 71,8                               | 74,4                     | 70,7  |
|       | Khosta-2 | 71,4                                         | 73,1                                    | 64,2            | 64,2                            | 64,2             | 64,2                               | 64,2                               | 64,2                     |       |
| N     | Khosta-1 | 96,64                                        | 92,6                                    | 88,36-88,9      | 89,1                            | 89,1             | 87,9                               | 87,6                               | 87,4                     | 91,85 |
|       | Khosta-2 | 91,13                                        | 90,21                                   | 85,75-<br>86,73 | 86,5                            | 86,5             | 85,5                               | 86,4                               | 85,24                    |       |

337

338 **Figure 1.** Map of the region where bat samples were collected. Location of Sochi

339 National Park and surrounding area is shown in grey.

340

341 **Figure 2.** Scheme of the genome of Khosta-1 and Khosta-2 viruses with the designation

342 of the main ORFs, and results of Simplot and recombination analysis. **A.** Khosta-1 was used as a

343 query sequence and Khosta-2, BM48-31/BGR/2008, and BtKy72 viruses were used as reference

344 sequences. **B.** Khosta-2 was used as a query sequence and Khosta-1, BM48-31/BGR/2008, and

345 BtKy72 were used as reference sequences. The analysis was performing with Kimura (2-

346 parametr) model, window size of 1000 bases and a step size of 100 bases. **C.** Results of bootstrap

347 analysis of recombination events in Khosta-1 genome by RDP5 software.

348

349           **Figure 3.** Phylogenetic trees inferred by maximum likelihood method based on analysis  
350 of amino acid sequences of ORF1ab protein (**A**) and nucleotide sequences of S gene (**B**). HKU9-  
351 like strain Bt-BetaCoV/GX2018, belonged to subgenus *Nobecovirus* (lineage D), was used as an  
352 outer group for ORF1ab protein phylogeny. The viruses described in present work are marked by  
353 black circle.

354

355           **Figure 4.** Alignment of receptor binding motif (RBM) of receptor binding domain (RBD)  
356 of S protein of Khosta-1 and Khosta-2 with certain sarbecoviruses. Position (442, 472, 479, 480,  
357 487, 491 numbering by SARS-CoV Urbani) in RBM which are thought to be important for  
358 adaptation SARS-CoV-like viruses to human ACE2 receptor (16,17) are bolded. Bat SARS-  
359 CoV-like viruses that are capable or not capable of utilizing ACE2 receptor are marked with  
360 “ACE2(+)” or “ACE2(-)”, respectively.

361

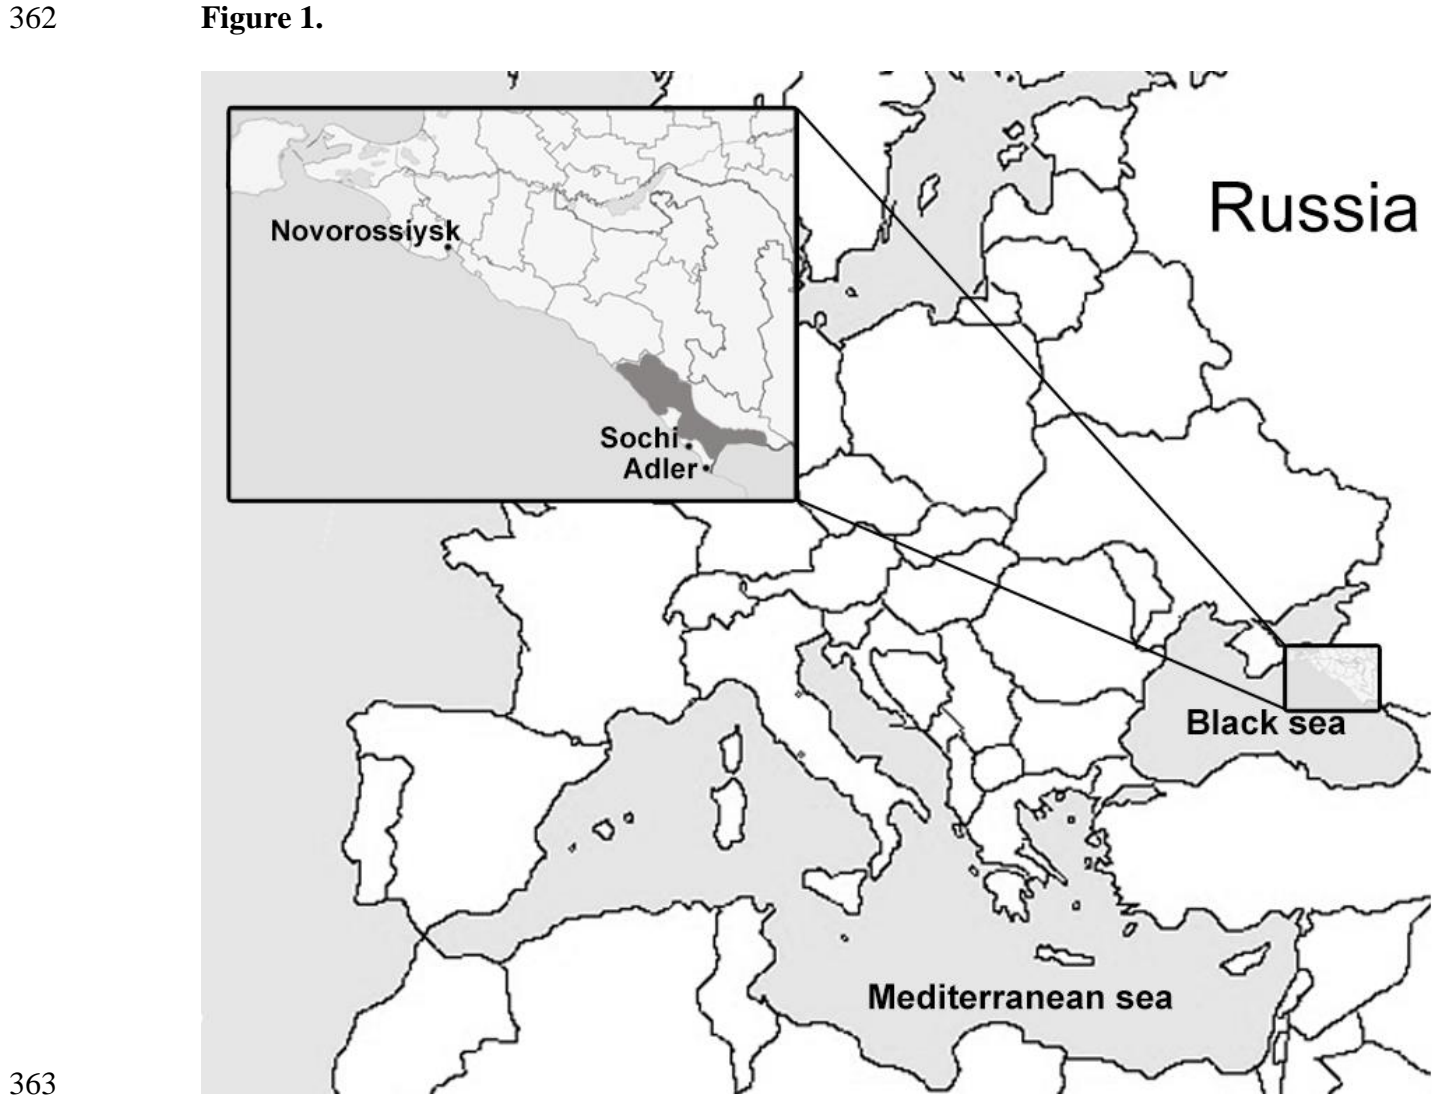

365

Figure 2A

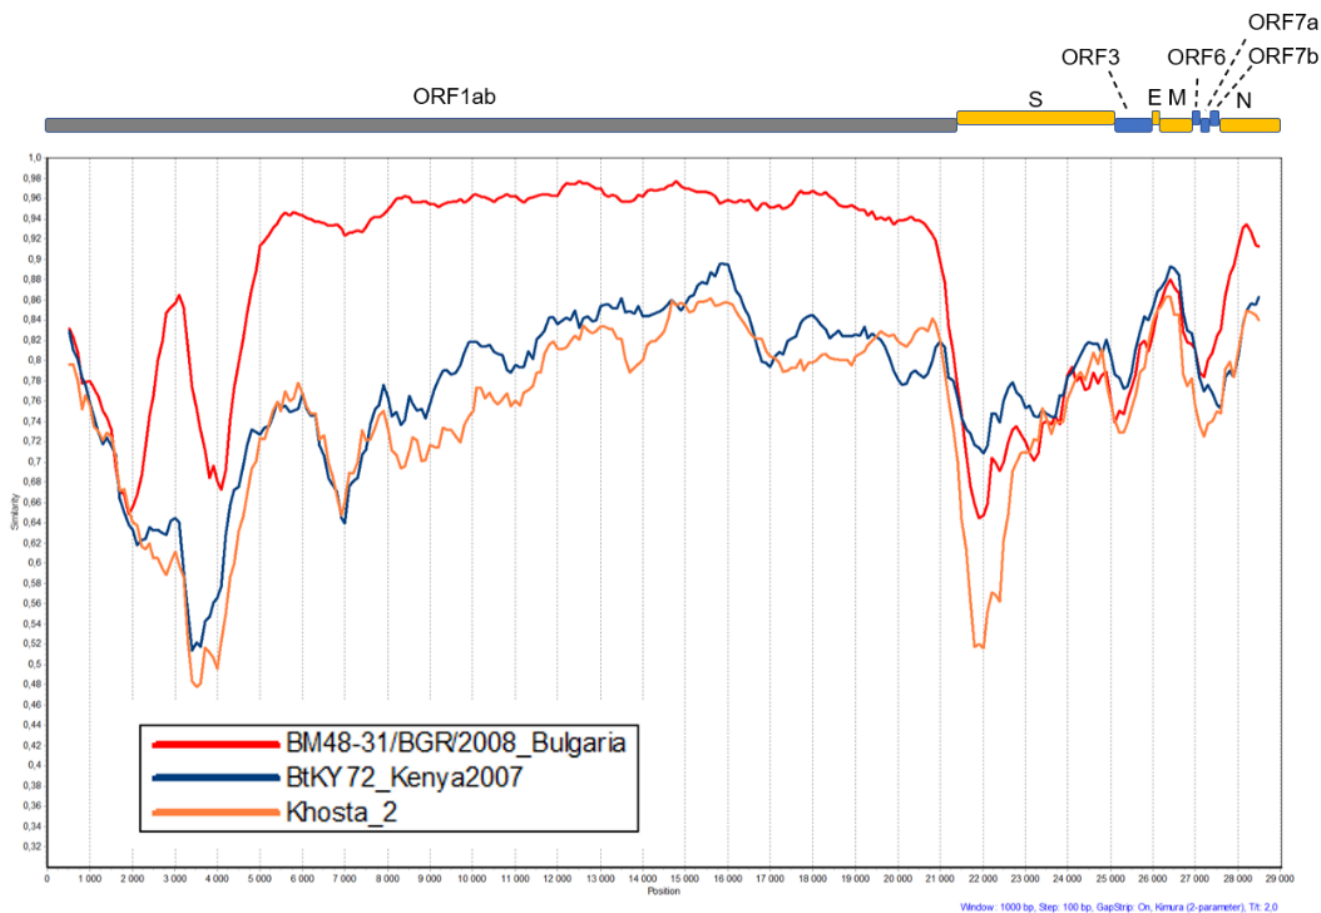

366

367

368 **Figure 2B.**

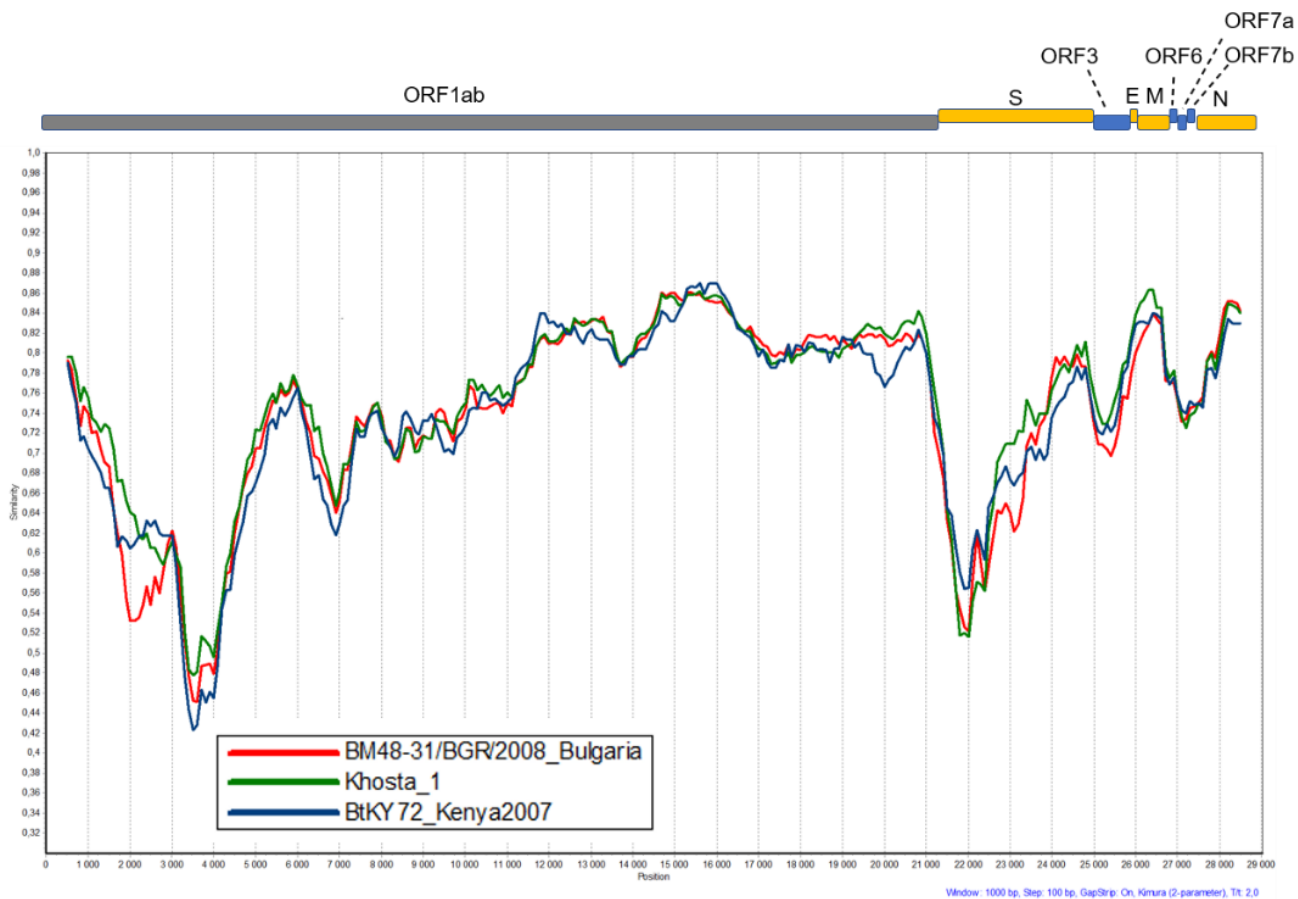

369

370

371 **Figure 2C.**

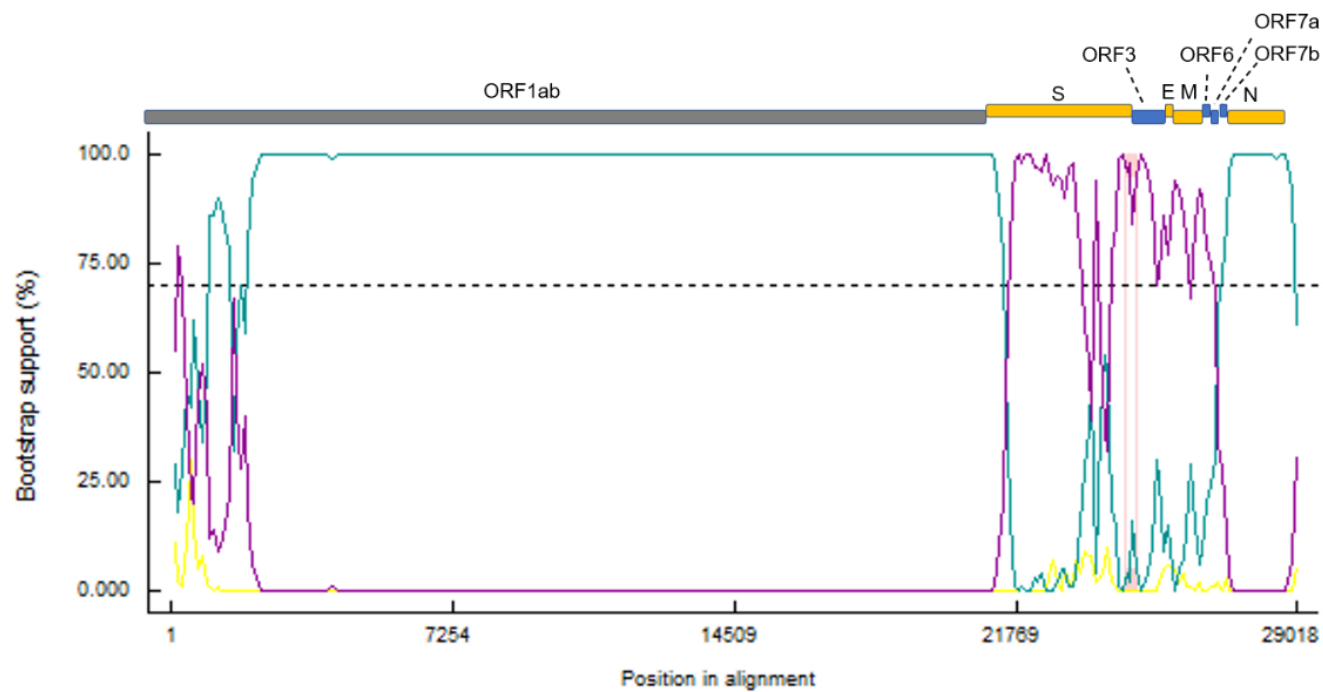

372

373

374 **Figure 3A**

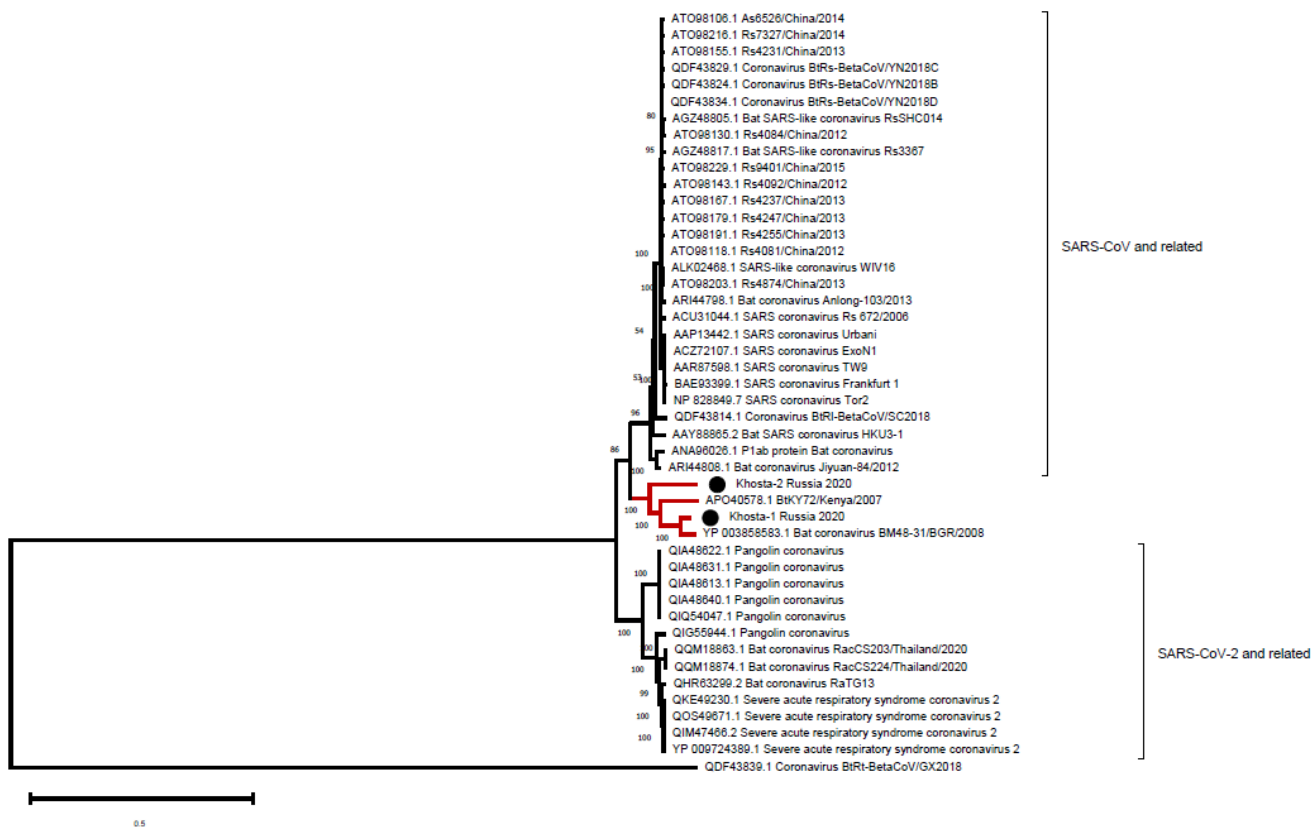

375

376

377 **Figure 3B.**

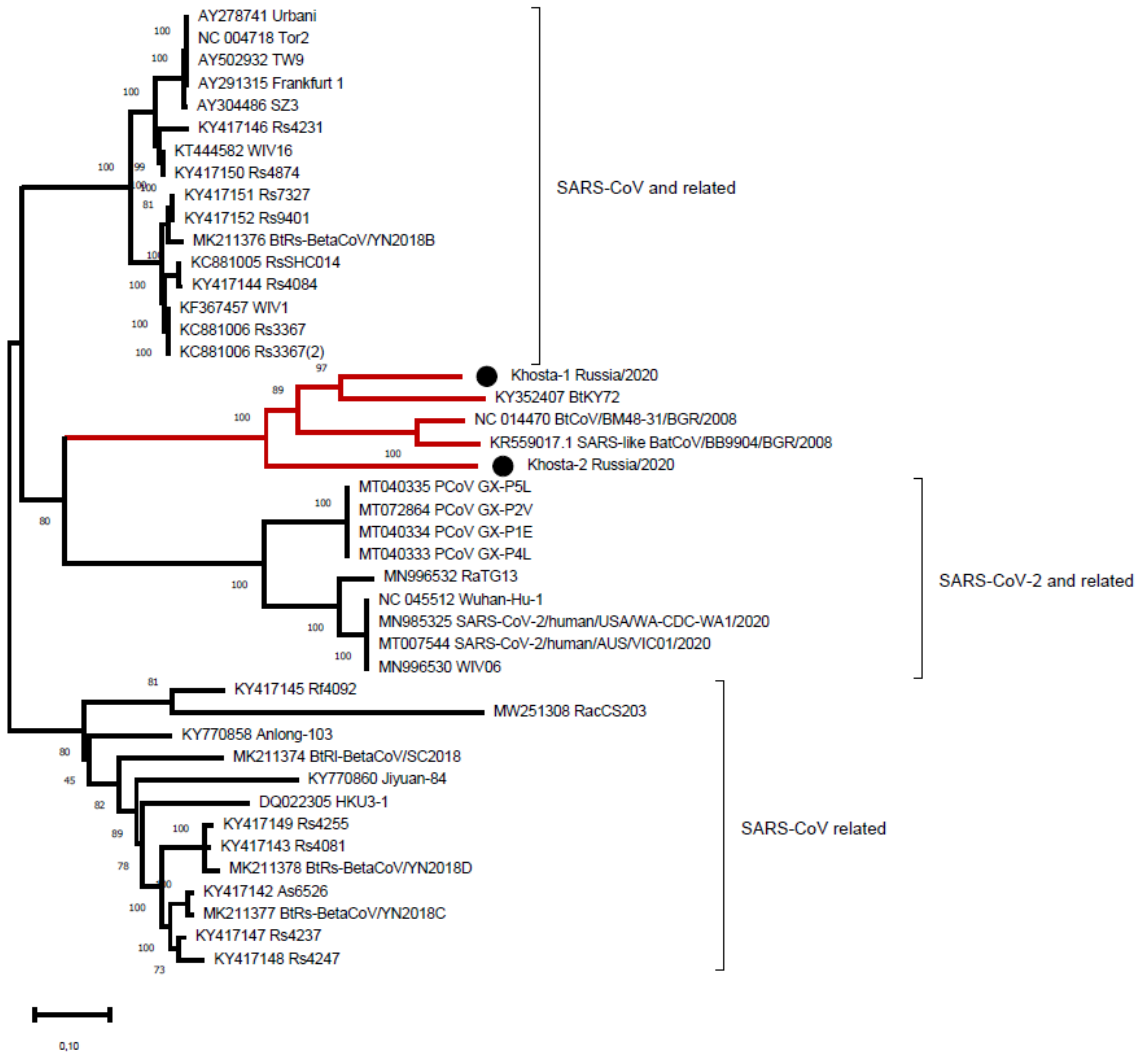

378

379



380 **Figure 4.**

|                      |                            | 442                                                                                                                                                                                                                                                       | 472 | 479-80 | 487 | 491 |
|----------------------|----------------------------|-----------------------------------------------------------------------------------------------------------------------------------------------------------------------------------------------------------------------------------------------------------|-----|--------|-----|-----|
|                      | Khosta-1                   | NTKSIDK----GQGFYR <b>L</b> FRHGKIKPYERDTSNVPYNAQGGTCTDTSQ <b>L</b> NCYQPL <b>K</b> SYDFTT <b>D</b> VG <b>V</b> GYQPY                                                                                                                                      |     |        |     |     |
|                      | Khosta-2                   | NTRTIDS----KRGFYR <b>L</b> FRHGKIRPYERDTSNVPYNAAGGTCNQP <b>G</b> THNCY <b>E</b> PL <b>Q</b> DYGF <b>T</b> ST <b>S</b> GV <b>G</b> YQPF                                                                                                                    |     |        |     |     |
|                      | NC_014470 BM48-31/BGR/2008 | NTNSLDS----SNEFFYR <b>R</b> FRHGKIKPYGRDLSNVLFPSPG-GTCSA <b>E</b> GLNCY <b>K</b> PL <b>A</b> SYGF <b>T</b> Q <b>S</b> SG <b>I</b> GF <b>Q</b> PY                                                                                                          |     |        |     |     |
|                      | KR559017 BB9904/BGR/2008   | NTNALDS----NKDFYR <b>L</b> FRHGKIKPYGRDLSNIPYSPSG-TCST <b>I</b> NN <b>L</b> NC <b>F</b> AP <b>L</b> K <b>S</b> YGF <b>T</b> Q <b>S</b> SG <b>I</b> S <b>F</b> QPY                                                                                         |     |        |     |     |
|                      | KY352407 BtKY72            | NTNSVDSKS--GNNFYR <b>L</b> FRHGKIKPYERDISNVLVNSAGGTCSS <b>I</b> S <b>Q</b> L <b>G</b> CY <b>E</b> PL <b>K</b> SYGF <b>T</b> P <b>T</b> VG <b>V</b> GYQPY                                                                                                  |     |        |     |     |
| SARS-CoV             | AY278741 SARS Urbani       | NTRNIDATSTGNYNYK <b>R</b> Y <b>L</b> LRHGKLRPFERDISNVPFSPDGK <b>P</b> CT <b>P</b> P- <b>A</b> LNCY <b>W</b> PL <b>N</b> DYGF <b>Y</b> TT <b>T</b> G <b>I</b> GYQPY                                                                                        |     |        |     |     |
|                      | AY304486 Civet SZ3         | NTRNIDATSTGNYNYK <b>R</b> Y <b>L</b> LRHGKLRPFERDISNVPFSPDGK <b>P</b> CT <b>P</b> P- <b>A</b> LNCY <b>W</b> PL <b>K</b> DYGF <b>Y</b> TT <b>S</b> G <b>I</b> GYQPY                                                                                        |     |        |     |     |
| SARS-CoV-2           | MT040335 Pangolin SARS-2   | NSVKQDALTG <b>G</b> NY <b>G</b> LY <b>L</b> R <b>F</b> RKS <b>K</b> L <b>P</b> PFERDIS <b>T</b> E <b>I</b> Y <b>Q</b> AG <b>S</b> T <b>P</b> C <b>N</b> G <b>V</b> Q <b>L</b> NCY <b>P</b> L <b>E</b> RYGF <b>H</b> PT <b>T</b> G <b>V</b> NYQPF          |     |        |     |     |
|                      | MN996532 RaTG13            | NSKHIDAKEGG <b>N</b> F <b>N</b> Y <b>L</b> R <b>F</b> RKAN <b>L</b> K <b>P</b> PFERDIS <b>T</b> E <b>I</b> Y <b>Q</b> AG <b>S</b> K <b>P</b> C <b>N</b> G <b>T</b> GLNCY <b>P</b> L <b>R</b> YGF <b>Y</b> P <b>T</b> D <b>G</b> V <b>G</b> HQPY           |     |        |     |     |
|                      | NC_045512 SARS-CoV-2       | NSNNLDSK <b>V</b> GG <b>N</b> Y <b>L</b> R <b>F</b> RKS <b>N</b> L <b>K</b> P <b>P</b> FERDIS <b>T</b> E <b>I</b> Y <b>Q</b> AG <b>S</b> T <b>P</b> C <b>N</b> G <b>V</b> EG <b>F</b> NCY <b>F</b> PL <b>Q</b> SYGF <b>Q</b> PT <b>N</b> G <b>V</b> GYQPY |     |        |     |     |
| Bat SARS-CoV         | KT444582 WIV16             | NTRNIDAT <b>Q</b> TG <b>N</b> Y <b>K</b> Y <b>R</b> S <b>L</b> RHGKLRPFERDISNVPFSPDGK <b>P</b> CT <b>P</b> P- <b>A</b> FNCY <b>W</b> PL <b>N</b> DYGF <b>Y</b> IT <b>N</b> G <b>I</b> GYQPY                                                               |     |        |     |     |
|                      | KF367457 WIV1              | NTRNIDAT <b>Q</b> TG <b>N</b> Y <b>K</b> Y <b>R</b> S <b>L</b> RHGKLRPFERDISNVPFSPDGK <b>P</b> CT <b>P</b> P- <b>A</b> FNCY <b>W</b> PL <b>N</b> DYGF <b>Y</b> IT <b>N</b> G <b>I</b> GYQPY                                                               |     |        |     |     |
| ACE2(+)              | KC881005 RsSHC014          | NTNSKDS <b>S</b> TSG <b>N</b> Y <b>L</b> R <b>W</b> RRSK <b>L</b> N <b>P</b> YERDLS <b>N</b> D <b>I</b> Y <b>S</b> PG <b>G</b> Q <b>S</b> CA <b>V</b> - <b>G</b> PNCY <b>N</b> PL <b>R</b> PYGF <b>F</b> TT <b>A</b> G <b>V</b> G <b>H</b> QPY            |     |        |     |     |
|                      | KY417151 Rs7327            | NTRNIDATSTGNYNYK <b>R</b> Y <b>L</b> LRHGKLRPFERDISNVPFSPDGK <b>P</b> CT <b>P</b> P- <b>A</b> FNCY <b>W</b> PL <b>N</b> DYGF <b>F</b> TT <b>N</b> G <b>I</b> GYQPY                                                                                        |     |        |     |     |
| Bat SARS-CoV ACE2(-) | DQ022305 HKU3-1            | NTAKHDTGN----- <b>Y</b> Y <b>R</b> S <b>H</b> R <b>K</b> T <b>K</b> L <b>P</b> PFERDLS <b>S</b> DD <b>G</b> ----- <b>N</b> GV <b>T</b> L <b>S</b> T <b>Y</b> DF <b>N</b> P <b>N</b> V <b>P</b> V <b>A</b> Y <b>Q</b> AT                                   |     |        |     |     |
|                      | KY417145 Rf4092            | NTAKQDVGS----- <b>Y</b> F <b>Y</b> R <b>S</b> H <b>R</b> S <b>S</b> K <b>L</b> K <b>P</b> PFERDLS <b>S</b> DE----- <b>N</b> GV <b>R</b> T <b>L</b> S <b>T</b> Y <b>D</b> F <b>N</b> P <b>N</b> V <b>P</b> L <b>D</b> Y <b>Q</b> AT                        |     |        |     |     |
|                      | KY417147 Rs4237            | NTAKQDQ <b>G</b> Q----- <b>Y</b> Y <b>R</b> S <b>S</b> R <b>K</b> T <b>K</b> L <b>K</b> P <b>P</b> FERDLS <b>S</b> DE----- <b>N</b> GV <b>R</b> T <b>L</b> S <b>T</b> Y <b>D</b> F <b>Y</b> P <b>T</b> V <b>P</b> I <b>E</b> Y <b>Q</b> AT                |     |        |     |     |
|                      | KY417148 Rs4247            | NTAKQDT <b>G</b> H----- <b>Y</b> Y <b>R</b> S <b>H</b> R <b>K</b> T <b>K</b> L <b>K</b> P <b>P</b> FERDLS <b>S</b> DD <b>G</b> ----- <b>N</b> GV <b>Y</b> T <b>L</b> S <b>T</b> Y <b>D</b> F <b>N</b> P <b>N</b> V <b>P</b> V <b>A</b> Y <b>Q</b> AT      |     |        |     |     |

381
